# Supplementary material for: Versatility of polyethylene glycol (PEG) in designing solid–solid phase change materials (PCMs) for thermal management and their application to innovative technologies
Source: Royal Society of Chemistry journal article supplement (doi:10.1039/c7ta04968d), 2017-01-01
Supplement: c7ta04968d1.pdf [file c7ta04968d1.pdf]

## SUPPORTING INFORMATION

Versatility of polyethylene glycol (PEG) in designing solid-solid phase change materials  
(PCMs) for thermal management and their application to innovative technologies

Swati Sundararajan, Asit B. Samui\*, Prashant S. Kulkarni\*

Energy and Environment Laboratory, Department of Applied Chemistry, Defence Institute of  
Advanced Technology, Deemed University, Girinagar, Pune- 411 025, India.

Fax: +91 20 2691533; Tel: +91 20 24304161, Email: [ps\\_kulkarni@rediffmail.com](mailto:ps_kulkarni@rediffmail.com),  
[absamui@gmail.com](mailto:absamui@gmail.com)

## CONTENTS

|                                                                                                            | Page No. |
|------------------------------------------------------------------------------------------------------------|----------|
| Table S1 Thermal properties of organic form-stable PEG/PEO based PCMs                                      | 3        |
| Table S2 Thermal properties of hybrid form-stable PEG based PCMs.                                          | 6        |
| Table S3 Thermal energy storage properties of electrospun fibers.                                          | 8        |
| Table S4 Thermal characteristics of PEG based PCMs having inherent<br>thermal conductivity.                | 9        |
| Table S5 Thermal properties of PEG based PCMs having additives for<br>improvement of thermal conductivity. | 10       |
| Table S6 Thermal properties of chemically modified PEG based SSPCMs.                                       | 11       |
| Table S7 Thermal properties of microencapsulated PEG based PCMs.                                           | 13       |
| References                                                                                                 | 14       |

The thermal properties of the organic form-stable PCMs reported in literature have been listed in Table S1. The heat storage efficiency ( $\gamma$ ) has been calculated in terms of heat loss percentage by using Eq. 1:<sup>1</sup>

$$\gamma = \left(1 - \frac{H_s}{H_m}\right) \times 100 \%$$

where  $H_s$  and  $H_m$  are solidification and melting enthalpy respectively.

With increasing percentage of heat loss, the efficiency of thermal energy storage decreases. The poly(acrylic acid)-PEG composite shows the lowest heat loss making it a highly efficient PEG based SSPCM whereas the composite of polyurethane prepared with PEG 6000 and graphene has high heat loss making it least efficient among the various organic form-stable materials explored. The use of porous supporting materials allows incorporation of high wt% of PEG thereby yielding high TES capacity.

Table S1 Thermal properties of organic form-stable PEG/PEO based PCMs.

| Type of PCM                  | Hard segment            | Soft segment  | Enthalpy of fusion (J.g <sup>-1</sup> ) | Phase change temperature (°C) | PEG wt% | Heat storage efficiency (%) | Reference |
|------------------------------|-------------------------|---------------|-----------------------------------------|-------------------------------|---------|-----------------------------|-----------|
| Cellulose-PEG                | Cellulose               | PEG 4000      | 142.9                                   | 52.2                          | 40.0    | 12.5                        | 2         |
| CDA-PEG                      | CDA                     | PEG 4000      | 104.5                                   | 52.0                          | 80.0    | -                           | 3         |
| CDA-PEG                      | CDA                     | PEG 4000      | 155.0                                   | 52.0                          | 85.0    | -                           | 4         |
| Cellulose-PEO                | Cellulose               | PEO<br>13,060 | 134.7                                   | 63.4                          | 25.0    | 5.4                         | 5         |
| Carboxymethyl cellulose- PEO | Carboxymethyl cellulose | PEO<br>13,060 | 140.2                                   | 58.4                          | 25.0    | 1.5                         | 5         |
| Cellulose ether- PEO         | Cellulose ether         | PEO<br>13,060 | 156.8                                   | 64.7                          | 25.0    | 2.2                         | 5         |
| Cellulose-PEG                | Cellulose               | PEG 4000      | 84.6                                    | 58.5                          | 60.0    | 6.7                         | 6         |

|                                    |                                |                           |       |               |      |      |    |
|------------------------------------|--------------------------------|---------------------------|-------|---------------|------|------|----|
| Agarose-PEG                        | Agarose                        | PEG 4000                  | 110.8 | 57.7          | 70.0 | 10.6 | 6  |
| Chitosan-PEG                       | Chitosan                       | PEG 4000                  | 152.1 | 57.1          | 80.0 | 9.0  | 6  |
| Cellulose-PEG-GNPs                 | Cellulose                      | PEG 6000                  | 156.1 | 63.0          | 89.2 | 4.6  | 7  |
| Cellulose acetate-PEG              | Cellulose acetate              | PEG 8000                  | 155.3 | 60.5          | 96.5 | -    | 8  |
| PMMA-PEG                           | PMMA                           | PEG                       | 141.6 | 56.9          | 80.0 | 1.1  | 9  |
| Eudragit S-PEG                     | Eudragit S                     | PEG                       | 144.2 | 50.9          | 80.0 | 1.8  | 9  |
| Eudragit E-PEG                     | Eudragit E                     | PEG                       | 148.8 | 56.9          | 80.0 | 2.6  | 9  |
| PMMA-PEG                           | PMMA                           | PEG 20,000                | 121.2 | 58.0          | 90.0 | 10.6 | 10 |
| Poly(acrylic acid)-PEG             | Poly(acrylic acid)             | PEG 10,000                | 135.1 | 56.3          | 90.0 | 0.7  | 11 |
| Poly(ethylene-co-acrylic acid)-PEG | Poly(ethylene-co-acrylic acid) | PEG 6000                  | 168.3 | 57.2          | 75.0 | 1.8  | 11 |
| PMMA-PEG-AIN                       | PMMA                           | PEG 2000                  | 115.6 | 46.4          | 70.0 | -    | 12 |
| PMMA-PEG-GNP                       | PMMA                           | PEG 2000                  | 124.4 | 44.6          | 69.3 | 13.7 | 13 |
| PU-BDO-Graphene                    | PU + BDO                       | PEG 6000                  | 160.1 | 59.4          | 50.0 | 14.6 | 14 |
| PU-n-eicosane                      | PU + BDO                       | PEG 10,000 and n-eicosane | 141.2 | 37.9 and 57.4 | 63.7 | 9.4  | 15 |
| PEG-MDI-glucose                    | Glucose                        | PEG 8000                  | 131.9 | 61.1          | 70.0 | 7.9  | 16 |
| PEG-active carbon                  | Active Carbon                  | PEG 6000                  | 90.2  | 62.5          | 70.0 | 5.6  | 17 |
| PEG-EG                             | EG                             | PEG                       | 156.0 | 62.0          | 90.0 | -    | 18 |
| PEG-AC                             | AC                             | PEG                       | 88.0  | 61.0          | 70.0 | -    | 18 |
| PEG-CMK-5                          | CMK-5                          | PEG                       | 148.0 | 63.0          | 90.0 | -    | 18 |

|                                      |                                   |                               |       |      |      |      |    |
|--------------------------------------|-----------------------------------|-------------------------------|-------|------|------|------|----|
| PEG alkyl ether-porous carbon        | Porous carbon                     | Brij58 (M <sub>n</sub> =1124) | -     | 45.2 | 70.0 | -    | 19 |
| PEG-porous carbon from MOF           | Porous carbon derived from MOF    | PEG 4000                      | 162.0 | 60.0 | 92.5 | -    | 20 |
| PEG-porous carbon from potato        | Porous carbon derived from potato | PEG 4000                      | 91.8  | 56.6 | 50.0 | 10.8 | 21 |
| PEO-potato starch                    | Gelatinized potato starch         | PEO 13,060                    | 96.9  | 57.6 | 75.0 | 2.3  | 22 |
| Glucose -PEG                         | Glucose                           | PEG                           | 153   | -    | 90.0 | -    | 23 |
| Lactose-PEG                          | Lactose                           | PEG                           | 156   | -    | 90.0 | -    | 23 |
| Fructose-PEG                         | Fructose                          | PEG                           | 152   | -    | 90.0 | -    | 23 |
| Epoxy-PEG                            | Epoxy                             | PEG 4000                      | 132.4 | 54.2 | 75.0 | -    | 24 |
| PEG-poly(acrylonitrile-co-itaconate) | Poly(acrylonitrile-co-itaconate)  | PEG 4000                      | 118.5 | 53.9 | 73.0 | 2.3  | 25 |

Table S2 lists the thermal properties of hybrid form-stable PEG base PCMs. Fire-retardant composite of PEG-silsesquioxane has been found to be a very efficient material with low heat loss and good thermal energy storage capability. Cement restricts the crystallization of PEG to a great extent thereby incurring high enthalpy loss for PEG-cement composite. The composites of PEG with inorganic hybrid materials offers promising thermal energy storage capacity with increasing molecular weight of PEG reaching a high fusion enthalpy of 162.9 J.g<sup>-1</sup> with PEG 10,000 composite with SiO<sub>2</sub>.

Table S2 Thermal properties of hybrid form-stable PEG based PCMs.

| Type of PCM                   | Hard segment                           | Soft segment                   | Enthalpy of fusion (J.g <sup>-1</sup> ) | Phase change temperature (°C) | PEG wt% | Heat storage efficiency (%) | Reference |
|-------------------------------|----------------------------------------|--------------------------------|-----------------------------------------|-------------------------------|---------|-----------------------------|-----------|
| PEG-SiO <sub>2</sub>          | SiO <sub>2</sub>                       | PEG 10,000                     | 162.9                                   | 61.6                          | 85.0    | -                           | 26        |
| PEG-SiO <sub>2</sub>          | SiO <sub>2</sub>                       | PEG 6000                       | 102.8                                   | 56.5                          | 80.0    | 1.0                         | 27        |
| PEG-SiO <sub>2</sub>          | SiO <sub>2</sub>                       | PEG 10,000                     | 74.5                                    | 59.3                          | 80.0    | -                           | 28        |
| PEG-SiO <sub>2</sub>          | SiO <sub>2</sub>                       | PEG 2000                       | 133.9                                   | 57.4                          | 80.0    | -                           | 29        |
| PEG-SiO <sub>2</sub>          | SiO <sub>2</sub>                       | PEG 2000                       | 122.0                                   | 36.0                          | 80.0    | 3.0                         | 30        |
| PEG-SiO <sub>2</sub>          | SiO <sub>2</sub>                       | PEG 4000                       | 151.8                                   | 58.0                          | 79.3    | 6.6                         | 31        |
| PEG-mesoporous matrices       | AC                                     | PEG 1500                       | 102.0                                   | 48.3                          | 80.0    | 5.4                         | 32        |
| PEG-mesoporous matrices       | SBA-15                                 | PEG 1500                       | 83.0                                    | 44.0                          | 80.0    | 7.1                         | 32        |
| PEG-mesoporous matrices       | MCM-41                                 | PEG 1500                       | 80.0                                    | 47.0                          | 80.0    | 4.7                         | 32        |
| PEG alkyl ether-porous silica | MCM-41                                 | Brij 58 (M <sub>n</sub> =1124) | 81.7                                    | 36.7                          | 60.0    | 4.5                         | 33        |
| PEG alkyl ether-porous silica | MCM-41                                 | Brij 76 (M <sub>n</sub> =711)  | 49.7                                    | 33.1                          | 60.0    | 27.7                        | 33        |
| PEG-radial mesoporous silica  | Mesoporous silica                      | PEG 4000                       | 129.6                                   | 57.2                          | 80.0    | 8.7                         | 1         |
| PEG-mesoporous silica         | NH <sub>2</sub> -SBA15-CH <sub>3</sub> | PEG 2000                       | 88.2                                    | 52.0                          | 70.0    | 6.8                         | 34        |
| Montmorillonite-              | Na-MMT                                 | PEG 1000                       | 104.8                                   | 32.9                          | 44.4    | 2.1                         | 35        |

| PEG                                       |                               |          |       |      |      |      |    |
|-------------------------------------------|-------------------------------|----------|-------|------|------|------|----|
| PEG-polymer clay nanocomposite            | Epoxy                         | PEG 1800 | 149.4 | 56.2 | 60.0 | 22.8 | 36 |
| PEG-organosiloxane containing phosphamide | Silsesquioxane                | PEG 2000 | 124.7 | 50.8 | 81.8 | 0.6  | 37 |
| PEG-diatomite                             | Diatomite                     | PEG 1000 | 87.0  | 27.7 | 50.0 | 5.5  | 38 |
| PEG-diatomite                             | Diatomite                     | PEG 4000 | 105.7 | 57.9 | 58.0 | 9.6  | 39 |
| PEG-diatomite                             | Diatomite                     | PEG 4000 | 103.7 | 59.0 | 55.0 | 11.2 | 40 |
| PEG-calcium silicate                      | Calcium silicate              | PEG 4000 | 122.1 | 57.0 | 70.0 | 12.5 | 41 |
| PEG-cement                                | Cement                        | PEG 1000 | 23.8  | 24.3 | 25.0 | 44.0 | 42 |
| Bischofite-PEG                            | Bischofite                    | PEG 2000 | 108.8 | 98.8 | 5.0  | -    | 43 |
| PEG-C <sub>3</sub> N <sub>4</sub>         | C <sub>3</sub> N <sub>4</sub> | PEG 6000 | -     | -    | 40.0 | -    | 44 |
| PEG-CNIC                                  | CNIC                          | PEG 6000 | 45.8  | 43.8 | 60.0 | 6.7  | 44 |

The thermal energy storage properties and average fiber diameter of reported electrospun fibers have been presented in Table S3. Biodegradable PEG-PLA electrospun fibres exhibit good thermal energy storage efficiency incorporating up to 66.7 wt% PEG. The highest phase change enthalpy was reported for Eu-PEG fibres having a value of 141.8 J.g<sup>-1</sup> at 63.9 °C and the lowest melting enthalpy was observed for PVA-PEG fibres.

Table S3 Thermal energy storage properties of electrospun fibers.

| Type of PCM                                        | Hard segment          | Soft segment | Enthalpy of fusion (J.g <sup>-1</sup> ) | Phase change temperature (°C) | PEG wt% | Average fiber diameter (nm) | Heat storage efficiency (%) | Reference |
|----------------------------------------------------|-----------------------|--------------|-----------------------------------------|-------------------------------|---------|-----------------------------|-----------------------------|-----------|
| CA-PEG                                             | CA                    | PEG 10,000   | 86.0                                    | 58.4                          | 85.0    | 1579                        | 24.2                        | 45        |
| CA-PEG                                             | CA                    | PEG 10,000   | 36.7                                    | 52.1                          | -       | -                           | 29.5                        | 46        |
| CA-PEG                                             | CA                    | PEG 1500     | 39.4                                    | 44.2                          | 15.9    | 384                         | 18.6                        | 47        |
| Polypropylene-poly(N-hydroxymethyl acrylamide)-PEG | Polypropylene         | PEG 2000     | 17.0                                    | 54.6                          | 14.0    | -                           | -                           | 48        |
| PEG-poly(dl-lactide)                               | PLA                   | PEG          | 74.7                                    | 58.7                          | 66.7    | 1540                        | 11.5                        | 49        |
| PVP-Eu-PEG                                         | Polyvinyl pyrrolidone | PEG 10,000   | 141.8                                   | 63.9                          | 17.0    | 989                         | -                           | 50        |
| Polyamide-6-PEG                                    | Polyamide-6           | PEG 4000     | 58.0                                    | 52.0                          | 30.0    | 104                         | -                           | 51        |
| Polyamide-6-PEG                                    | Polyamide-6           | PEG 1000     | 100.0                                   | 67.0                          | 33.3    | 59                          | -                           | 52        |
| PVA-PEG                                            | PVA                   | PEG 2000     | 27.8                                    | 48.3                          | 22.2    | -                           | -                           | 53        |
| PEG monoester of maleic anhydride                  | P(AN-co-AM)           | MAPEG 4000   | 66.3                                    | 50.7                          | 20.0    | 448                         | 14.6                        | 54        |



Table S4 lists the thermal characteristics of inherently thermally conductive PEG based form-stable PCMs. It can be inferred that the introduction of GNPs to PEG-GO composite affords high thermal conductivity of  $1.72 \text{ W.m}^{-1}.\text{K}^{-1}$  with high thermal storage efficiency. The MWCNT-PEG composite offers high enthalpy efficiency and hybrid graphene aerogels permit high fusion enthalpy of  $185.6 \text{ J.g}^{-1}$  with good thermal conductivity of  $1.43 \text{ W.m}^{-1}.\text{K}^{-1}$ . Almost all other composites have comparable heat loss percentages.

Table S4 Thermal characteristics of PEG based PCMs having inherent thermal conductivity.

| Type of PCM                  | Hard segment     | Soft segment | Enthalpy of fusion ( $\text{J.g}^{-1}$ ) | Phase change temperature ( $^{\circ}\text{C}$ ) | PEG wt% | Enthalpy efficiency (%) | Thermal conductivity ( $\text{W.m}^{-1}.\text{K}^{-1}$ ) | Reference |
|------------------------------|------------------|--------------|------------------------------------------|-------------------------------------------------|---------|-------------------------|----------------------------------------------------------|-----------|
| PEG-EG                       | EG               | PEG 1000     | 161.2                                    | 61.4                                            | 90.0    | 8.8                     | 1.32                                                     | 55        |
| PEG-GO                       | GO               | PEG 6000     | 156.9                                    | 62.3                                            | 90.0    | -                       | -                                                        | 56        |
| PEG-GO                       | GO               | PEG 6000     | 142.8                                    | 52.8                                            | 96.0    | 5.4                     | -                                                        | 57        |
| PEG-GO                       | GO               | PEG 4000     | 174.5                                    | 62.9                                            | 96.0    | 9.2                     | -                                                        | 58        |
| PEG-GO-GNP                   | GO               | PEG 10,000   | 178.1                                    | 64.9                                            | 96.0    | 8.1                     | 1.72                                                     | 59        |
| PEG-GO                       | GO               | PEG 6000     | -                                        | 45.2                                            | 80.0    | -                       | -                                                        | 60        |
| PEG-SG                       | SG               | PEG 4000     | 165.1                                    | 58.0                                            | 96.0    | -                       | 1.04                                                     | 61        |
| MWCNT-PEG                    | MWCNT-OH         | PEG 10,000   | 147.0                                    | 62.9                                            | 90.0    | 2.5                     | -                                                        | 62        |
| Hybrid graphene aerogel      | Graphene aerogel | PEG 10,000   | 185.6                                    | 64.8                                            | 97.7    | 4.2                     | 1.43                                                     | 63        |
| PU-graphite foam (GF)        | GF               | PEG 8000     | 80.3                                     | 46.1                                            | -       | -                       | 3.5                                                      | 64        |
| PU-pitch based graphite foam | PGF              | PEG 6000     | 60.3                                     | 43.8                                            | 73.0    | -                       | 10.86                                                    | 65        |

Table S5 summarizes the thermal properties of various PEG based PCMs to which additives have been incorporated for improvement of thermal conductivity. The addition of GNP has been found to be highly beneficial in gaining high thermal conductivity of  $2.33 \text{ W.m}^{-1}.\text{K}^{-1}$ . On addition of MWCNT to PEG-SiO<sub>2</sub> composite, high enthalpy of  $135 \text{ J.g}^{-1}$  was achieved without hampering thermal energy storage efficiency of the composite.

Table S5 Thermal properties of PEG based PCMs having additives for improvement of thermal conductivity.

| Type of PCM              | Hard segment         | Soft segment | Thermal conductivity enhancer | Wt% of thermally conductive filler | Enthalpy of fusion ( $\text{J.g}^{-1}$ ) | Phase change temperature ( $^{\circ}\text{C}$ ) | Thermal conductivity ( $\text{W.m}^{-1}.\text{K}^{-1}$ ) | Reference     |
|--------------------------|----------------------|--------------|-------------------------------|------------------------------------|------------------------------------------|-------------------------------------------------|----------------------------------------------------------|---------------|
| PEG-graft-cellulose      | Cellulose            | PEG 8000     | Ni nanoparticles              | 6.0                                | 51.0                                     | 60.0                                            | 0.64                                                     | <sup>66</sup> |
| mPEG-g-cellulose         | Cellulose            | mPEG 5000    | EG                            | 10.0                               | 87.6                                     | 58.9                                            | 0.80                                                     | <sup>67</sup> |
| PEG-SiO <sub>2</sub>     | SiO <sub>2</sub>     | PEG 1000     | AlN                           | 20.0                               | 129.5                                    | 61.1                                            | 0.56                                                     | <sup>68</sup> |
| PEG-SiO <sub>2</sub>     | SiO <sub>2</sub>     | PEG 6000     | Cu                            | 2.1                                | 110.2                                    | 56.6                                            | 0.41                                                     | <sup>69</sup> |
| PEG-SiO <sub>2</sub>     | SiO <sub>2</sub>     | PEG 6000     | MWCNT                         | 3.0                                | 135.1                                    | 53.3                                            | 0.46                                                     | <sup>70</sup> |
| PEG-PMMA                 | PMMA                 | PEG 2000     | AlN                           | 30.0                               | 79.2                                     | 46.0                                            | 0.38                                                     | <sup>12</sup> |
| PEG-PMMA                 | PMMA                 | PEG 2000     | GNP                           | 8.0                                | 114.1                                    | 41.9                                            | 2.33                                                     | <sup>13</sup> |
| PEG-diatomite            | Diatomite            | PEG          | Ag nanoparticles              | 7.2                                | 111.3                                    | 59.4                                            | 0.82                                                     | <sup>71</sup> |
| PEG-expanded vermiculite | Expanded vermiculite | PEG 4000     | Ag nanowire                   | 19.3                               | 99.1                                     | 59.9                                            | 0.68                                                     | <sup>72</sup> |

Table S6 Thermal properties of chemically modified PEG based SSPCMs.

| Type of PCM                                            | Hard segment             | Soft segment | Linkage  | Enthalpy of fusion (J.g <sup>-1</sup> ) | Phase change temperature (°C) | Heat storage efficiency (%) | Reference |
|--------------------------------------------------------|--------------------------|--------------|----------|-----------------------------------------|-------------------------------|-----------------------------|-----------|
| PEG-MDI-BDO                                            | MDI and BDO              | PEG 10,000   | Urethane | 138.7                                   | 65.2                          | 9.0                         | 73        |
| PEG-MDI-PE                                             | MDI and PE               | PEG 10,000   | Urethane | 152.9                                   | 58.6                          | -                           | 74        |
| PEG-MDI-PVA                                            | MDI and PVA              | PEG 4000     | Urethane | 72.8                                    | 61.1                          | -                           | 75        |
| PEG-IPDI-BDO                                           | IPDI and BDO             | PEG 3400     | Urethane | 99.0                                    | 46.9                          | 18.1                        | 76        |
| PEG-diisocyanates                                      | HMDI                     | PEG 6000     | Urethane | 176.0                                   | 59.9                          | 0.6                         | 77        |
| PEG-MDI-multibenzene ring tetrahydroxy compound (THCD) | MDI and THCD             | PEG 6000     | Urethane | 137.4                                   | 56.1                          | 7.1                         | 78        |
| PEG-MDI-TABE                                           | MDI and TABE             | PEG 6000     | Urethane | 153.5                                   | 48.4                          | 6.2                         | 79        |
| PEG-MDI-β-cyclodextrin                                 | MDI and β-cyclodextrin   | PEG 8000     | Urethane | 115.2                                   | 60.2                          | 3.1                         | 80        |
| PEG-MDI-trihydroxy surfactants                         | MDI and Tween 80         | PEG 6000     | Urethane | 127.7                                   | 47.8                          | 1.9                         | 81        |
| PEG-MDI-hexahydroxy compounds                          | MDI and sorbitol         | PEG 8000     | Urethane | 107.5                                   | 59.7                          | 4.2                         | 82        |
| PEG-HMDI-castor oil                                    | HMDI and castor oil      | PEG 6000     | Urethane | 117.7                                   | 51.4                          | 7.3                         | 83        |
| PEG-diethanolamine-IPDI-BDO                            | Comb structured PU       | PEG 5000     | Urethane | 121.9                                   | 59.0                          | 3.1                         | 84        |
| PEG-MDI-diethanolamine                                 | Thermosetting PU         | PEG 6000     | Urethane | 98.2                                    | 49.9                          | 3.8                         | 85        |
| PEG-MDI-MDEA-1,3-propanesulphonate                     | MDI and MDEA             | PEG 10,000   | Urethane | 152.3                                   | 60.8                          | 1.7                         | 86        |
| PEG-IPDI-cotton                                        | IPDI and cotton          | PEG 8000     | Urethane | 56.0                                    | 62.0                          | 28.5                        | 66        |
| PEG-MDI-HB polyester                                   | MDI and HB polyester     | PEG 6000     | Urethane | 138.2                                   | 67.0                          | 4.2                         | 87        |
| PEG-TDI-HB polyester                                   | TDI and HB polyester     | PEG 6000     | Urethane | 124.8                                   | 66.6                          | 2.7                         | 88        |
| PEG-MDI-HB polyester                                   | MDI and HB polyester     | PEG 6000     | Urethane | 138.2                                   | 67.0                          | 4.2                         | 89        |
| PEG-MDI-HB polyester-PE                                | MDI, HB polyester and PE | PEG 6000     | Urethane | 125.0                                   | 59.0                          | 3.5                         | 90        |

|                                                 |                                                          |                                                      |          |              |      |       |     |
|-------------------------------------------------|----------------------------------------------------------|------------------------------------------------------|----------|--------------|------|-------|-----|
| PEG-CDA                                         | TDI and CDA                                              | PEG 4000                                             | Urethane | 73.6         | 42.0 | -     | 3   |
| PEG-CDA                                         | TDI and CDA                                              | PEG 10,000                                           | Urethane | 142.0        | 62.0 | -     | 91  |
| mPEG-cellulose                                  | Cellulose                                                | mPEG 2000                                            | Ether    | 149.1        | 50.4 | 11.1  | 92  |
| mPEG-cellulose                                  | MDI and Cellulose                                        | mPEG                                                 | Urethane | 153.6        | 58.9 | 0.3   | 67  |
| mPEG-TDI-styrene                                | TDI and Styrene                                          | mPEG                                                 | Urethane | 108.5        | 57.7 | 24.7  | 93  |
| Poly(PEG methyl ether methacrylate)             | -                                                        | PEG methyl ether methacrylate (M <sub>n</sub> =2080) | Ester    | 132.5        | 44.7 | 10.4  | 94  |
| Poly(decaglycerol-co-ethylene glycol)           | Poly(decaglycerol)                                       | PEG 4000                                             | Ester    | 163.5        | 51.1 | 13.5  | 95  |
| Crosslinked PEGA                                | -                                                        | PEGA 4050                                            | Ester    | 141.3        | 52.4 | 13.4  | 96  |
| Poly(PEG octadecyl ether methacrylate)          | MMA                                                      | PEG octadecyl ether                                  | Ester    | 73.0         | 41.1 | 10.9  | 97  |
| PEG-PET                                         | PET                                                      | PEG 6000                                             | Ester    | 26.8         | 52.2 | 26.4  | 98  |
| Eu-PEG                                          | Eu coordinated with phenanthroline and terephthalic acid | PEG 2000                                             | Ester    | 96.6         | 72.1 | 13.89 | 99  |
| PEG-PAM                                         | PAM                                                      | PEG 10,000                                           | Ether    | 159.4 kJ/mol | 58.9 | 13.2  | 100 |
| PEG-poly(glycidyl methacrylate)                 | Poly(glycidyl methacrylate)                              | PEG 10,000                                           | Ester    | 73.2         | 55.9 | 4.6   | 101 |
| PEG-Polystyrene                                 | Polystyrene                                              | PEG 6000                                             | Ether    | 179.4        | 44.9 | 19.9  | 102 |
| PEG-Polyacrylonitrile                           | Polyacrylonitrile                                        | PEG 4000                                             | Ester    | 74.1         | 51.4 | 11.8  | 103 |
| PEG-melamine-formaldehyde                       | Melamine-formaldehyde                                    | PEG 6000                                             | Amine    | 109.4        | 57.7 | 5.1   | 104 |
| PEG-poly(styrene-co-acrylonitrile)              | Poly(styrene-co-acrylonitrile)                           | PEG 4000                                             | Ester    | 66.8         | 23.0 | 2.0   | 105 |
| PEG-PHBV                                        | PHBV                                                     | PEG 2000                                             | Ester    | 134.3        | 56.0 | 19.28 | 106 |
| Crosslinked PEG-poly(hydroxyethyl methacrylate) | Poly(hydroxyethyl methacrylate)                          | PEG 8000                                             | Ether    | 144.5        | 60.9 | -     | 107 |

Table S7 Thermal properties of microencapsulated PEG based PCMs.

| Type of polymerization | Core material                                               | Shell material | Particle size (nm) | Phase change temperature (°C) | Enthalpy of fusion (J.g <sup>-1</sup> ) | Enthalpy efficiency (%) | Reference |
|------------------------|-------------------------------------------------------------|----------------|--------------------|-------------------------------|-----------------------------------------|-------------------------|-----------|
| In-situ                | PEG 6000                                                    | UF             | 141 nm             | 41.9                          | 17.8                                    | -                       | 108       |
| In-situ                | n-octadecane and PEG 600                                    | UF             | 296.7 μm           | 28.6                          | 3.9                                     | 58.9                    | 109       |
| In-situ                | Na <sub>2</sub> CO <sub>3</sub> , PEG 1000 and n-hexadecane | UF             | -                  | 17.7                          | 44.6                                    | 4.7                     | 109       |
| Suspension             | PEG 800                                                     | Polystyrene    | 0.13 μm            | 0                             | 0                                       | 0                       | 110       |
| Suspension             | PEG 1000                                                    | Polystyrene    | 0.14 μm            | 0                             | 0                                       | 0                       | 110       |

## References:

- 1 X. Min, M. Fang, Z. Huang, Y. Liu, Y. Huang, R. Wen, T. Qian and X. Wu, *Sci. Rep.*, 2015, **5**, 12964.
- 2 X.-H. Liang, Y.-Q. Guo, L.-Z. Gu and E.-Y. Ding, *Macromolecules*, 1995, **28**, 6551–6555.
- 3 E.-Y. Ding, Y. Jiang and G.-K. Li, *J. Macromol. Sci. Part B*, 2001, **40**, 1053–1068.
- 4 Y. Guo, Z. Tong, M. Chen and X. Liang, *J. Appl. Polym. Sci.*, 2003, **88**, 652–658.
- 5 K. Pielichowska and K. Pielichowski, *Polym. Adv. Technol.*, 2011, **22**, 1633–1641.
- 6 S. B. Şentürk, D. Kahraman, C. Alkan and İ. Gökçe, *Carbohydr. Polym.*, 2011, **84**, 141–144.
- 7 J. Yang, E. Zhang, X. Li, Y. Zhang, J. Qu and Z. Yu, *Carbon*, 2016, **98**, 50–57.
- 8 S. Sundararajan, A. B. Samui and P. S. Kulkarni, *Sol. Energy*, 2017, **144**, 32–39.
- 9 C. Alkan, A. Sari and O. Uzun, *AIChE J.*, 2006, **52**, 3310–3314.
- 10 A. Sarı, C. Alkan, A. Karaipekli and O. Uzun, *J. Appl. Polym. Sci.*, 2010, **21**, 929–933.
- 11 C. Alkan, E. Günther, S. Hiebler and M. Himpel, *Energy Convers. Manag.*, 2012, **64**, 364–370.
- 12 L. Zhang, J. Zhu, W. Zhou, J. Wang and Y. Wang, *Thermochim. Acta*, 2011, **524**, 128–134.
- 13 L. Zhang, J. Zhu, W. Zhou, J. Wang and Y. Wang, *Energy*, 2012, **39**, 294–302.
- 14 K. Pielichowska, M. Nowak, P. Szatkowski and B. Macherzyńska, *Appl. Energy*, 2016, **162**, 1024–1033.
- 15 K. Chen, X. Yu, C. Tian and J. Wang, *Energy Convers. Manag.*, 2014, **77**, 13–21.
- 16 C. Chen, W. Liu, Z. Wang, K. Peng, W. Pan and Q. Xie, *Sol. Energy Mater. Sol. Cells*, 2014, **134**, 80–88.

- 17 L. Feng, J. Zheng, H. Yang, Y. Guo, W. Li and X. Li, *Sol. Energy Mater. Sol. Cells*, 2011, **95**, 644–650.
- 18 C. Wang, L. Feng, W. Li, J. Zheng, W. Tian and X. Li, *Sol. Energy Mater. Sol. Cells*, 2012, **105**, 21–26.
- 19 L. Zhang, H. Shi, W. Li, X. Han and X. Zhang, *Polym. Int.*, 2014, **63**, 982–988.
- 20 J. Tang, M. Yang, W. Dong, M. Yang, H. Zhang, S. Fan, J. Wang, L. Tan and G. Wang, *RSC Adv.*, 2016, **6**, 40106–40114.
- 21 B. Tan, Z. Huang, Z. Yin, X. Min, Y. Liu, X. Wu and M. Fang, *RSC Adv.*, 2016, **6**, 15821–15830.
- 22 K. Pielichowska and K. Pielichowski, *J. Appl. Polym. Sci.*, 2010, **21**, 1725–1731.
- 23 C. Alkan, E. Günther, S. Hiebler, Ö. F. Ensari and D. Kahraman, *Polym. Compos.*, 2012, **33**, 1728–1736.
- 24 Y. Fang, H. Kang, W. Wang, H. Liu and X. Gao, *Energy Convers. Manag.*, 2010, **51**, 2757–2761.
- 25 S. Mu, J. Guo, Y. Yu, Q. An, S. Zhang, D. Wang, S. Chen, X. Huang and S. Li, *Energy Convers. Manag.*, 2016, **110**, 176–183.
- 26 W. Wang, X. Yang, Y. Fang and J. Ding, *Appl. Energy*, 2009, **86**, 170–174.
- 27 B. Tang, J. Cui, Y. Wang, C. Jia and S. Zhang, *Sol. Energy*, 2013, **97**, 484–492.
- 28 H. Yang, L. Feng, C. Wang, W. Zhao and X. Li, *Eur. Polym. J.*, 2012, **48**, 803–810.
- 29 J. Li, L. He, T. Liu, X. Cao and H. Zhu, *Sol. Energy Mater. Sol. Cells*, 2013, **118**, 48–53.
- 30 L. He, J. Li, C. Zhou, H. Zhu, X. Cao and B. Tang, *Sol. Energy*, 2014, **103**, 448–455.
- 31 T. Qian, J. Li, H. Ma and J. Yang, *Sol. Energy Mater. Sol. Cells*, 2015, **132**, 29–39.

- 32 L. Feng, W. Zhao, J. Zheng, S. Frisco, P. Song and X. Li, *Sol. Energy Mater. Sol. Cells*, 2011, **95**, 3550–3556.
- 33 L. Zhang, H. Shi, W. Li, X. Han and X. Zhang, *Thermochim. Acta*, 2013, **570**, 1–7.
- 34 J. Wang, M. Yang, Y. Lu, Z. Jin, L. Tan, H. Gao, S. Fan, W. Dong and G. Wang, *Nano Energy*, 2016, **19**, 78–87.
- 35 E. Onder, N. Sarier, G. Ukuser, M. Ozturk and R. Arat, *Thermochim. Acta*, 2013, **566**, 24–35.
- 36 A. R. Bahramian, L. S. Ahmadi and M. Kokabi, *Iran. Polym. J.*, 2014, **23**, 163–169.
- 37 Y. Qian, P. Wei, P. Jiang, Z. Li, Y. Yan and J. Liu, *Appl. Energy*, 2013, **106**, 321–327.
- 38 S. Karaman, A. Karaipekli, A. Sari and A. Biçer, *Sol. Energy Mater. Sol. Cells*, 2011, **95**, 1647–1653.
- 39 T. Qian, J. Li, X. Min, Y. Deng, W. Guan and L. Ning, *Energy Convers. Manag.*, 2015, **98**, 34–45.
- 40 J. Lv, Y. Song, L. Jiang and J. Wang, *ACS Nano*, 2014, **8**, 3152–3169.
- 41 T. Qian, J. Li, X. Min, Y. Deng, W. Guan and H. Ma, *Energy*, 2015, **82**, 333–340.
- 42 H. Li and G.-Y. Fang, *Chem. Eng. Technol.*, 2010, **33**, 1650–1654.
- 43 A. Gutierrez, S. Ushak, H. Galleguillos, A. Fernandez, L. F. Cabeza and M. Grágeda, *Appl. Energy*, 2015, **154**, 616–621.
- 44 L. Feng, P. Song, S. Yan, H. Wang and J. Wang, *Thermochim. Acta*, 2015, **612**, 19–24.
- 45 C. Chen, L. Wang and Y. Huang, *Polymer*, 2007, **48**, 5202–5207.
- 46 C. Chen, L. Wang and Y. Huang, *Mater. Lett.*, 2009, **63**, 569–571.
- 47 B. Rezaei, M. Askari, A. M. Shoushtari and R. A. M. Malek, *J. Therm. Anal. Calorim.*, 2014, **118**, 1619–1629.



- 48 H. Zhang, S. Yang, H. Liu, Y. Fang, S. Jiang, J. Guo and Y. Gong, *J. Appl. Polym. Sci.*, 2013, **129**, 1563–1568.
- 49 C. Chen, K. Liu, H. Wang, W. Liu and H. Zhang, *Sol. Energy Mater. Sol. Cells*, 2013, **117**, 372–381.
- 50 Q. Shi, Z. Liu, X. Jin, Y. Shen and Y. Liu, *Mater. Lett.*, 2015, **147**, 113–115.
- 51 H. Chen, Q. Ma, S. Wang, H. Liu and K. Wang, *J. Ind. Text.*, 2016, **45**, 1490–1503.
- 52 A. Babapoor, G. Karimi and M. Khorram, *Appl. Therm. Eng.*, 2016, **99**, 1225–1235.
- 53 Z. Li, W. He, J. Xu and M. Jiang, *Sol. Energy Mater. Sol. Cells*, 2015, **140**, 193–201.
- 54 L. Zhang, J. Guo, X. You, Y. Liu, L. Yang, B. Zhang, S. Zhang and Y. Gong, *High Perform. Polym.*, 2016, **28**, 231–238.
- 55 W. Wang, X. Yang, Y. Fang, J. Ding and J. Yan, *Appl. Energy*, 2009, **86**, 1479–1483.
- 56 C. Wang, L. Feng, H. Yang, G. Xin, W. Li, J. Zheng, W. Tian and X. Li, *Phys. Chem. Chem. Phys.*, 2012, **14**, 13233–13238.
- 57 G.-Q. Qi, C.-L. Liang, R.-Y. Bao, Z.-Y. Liu, W. Yang, B.-H. Xie and M.-B. Yang, *Sol. Energy Mater. Sol. Cells*, 2014, **123**, 171–177.
- 58 W. Xiong, Y. Chen, M. Hao, L. Zhang, T. Mei, J. Wang, J. Li and X. Wang, *Appl. Therm. Eng.*, 2015, **91**, 630–637.
- 59 G.-Q. Qi, J. Yang, R.-Y. Bao, Z.-Y. Liu, W. Yang, B.-H. Xie and M.-B. Yang, *Carbon*, 2015, **88**, 196–205.
- 60 C. Wang, W. Wang, G. Xin, G. Li, J. Zheng, W. Tian and X. Li, *Eur. Polym. J.*, 2016, **74**, 43–50.
- 61 H. Li, M. Jiang, Q. Li, D. Li, Z. Chen, W. Hu, J. Huang, X. Xu, L. Dong, H. Xie and C. Xiong,

- Energy Convers. Manag.*, 2013, **75**, 482–487.
- 62 L. Feng, C. Wang, P. Song, H. Wang and X. Zhang, *Appl. Therm. Eng.*, 2015, **90**, 952–956.
- 63 J. Yang, G. Qi, Y. Liu, R. Bao, Z. Liu, W. Yang, B. Xie and M. Yang, *Carbon*, 2016, **100**, 693–702.
- 64 R. Chen, R. Yao, W. Xia and R. Zou, *Appl. Energy*, 2015, **152**, 183–188.
- 65 W. Wu, X. Huang, K. Li, R. Yao, R. Chen and R. Zou, *Appl. Energy*, 2017, **190**, 474–480.
- 66 A. Kumar, P. S. Kulkarni and A. B. Samui, *Cellulose*, 2014, **21**, 685–696.
- 67 Y. Li, M. Wu, R. Liu and Y. Huang, *Sol. Energy Mater. Sol. Cells*, 2009, **93**, 1321–1328.
- 68 W. Wang, X. Yang, Y. Fang, J. Ding and J. Yan, *Appl. Energy*, 2009, **86**, 1196–1200.
- 69 B. Tang, M. Qiu and S. Zhang, *Sol. Energy Mater. Sol. Cells*, 2012, **105**, 242–248.
- 70 B. Tang, Y. Wang, M. Qiu and S. Zhang, *Sol. Energy Mater. Sol. Cells*, 2014, **123**, 7–12.
- 71 T. Qian, J. Li, X. Min, W. Guan, Y. Deng and L. Ning, *J. Mater. Chem. A*, 2015, **3**, 8526–8536.
- 72 Y. Deng, J. Li, T. Qian, W. Guan, Y. Li and X. Yin, *Chem. Eng. J.*, 2016, **295**, 427–435.
- 73 J.-C. Su and P.-S. Liu, *Energy Convers. Manag.*, 2006, **47**, 3185–3191.
- 74 W.-D. Li and E.-Y. Ding, *Sol. Energy Mater. Sol. Cells*, 2007, **91**, 764–768.
- 75 X.-M. Zhou, *J. Appl. Polym. Sci.*, 2009, **113**, 2041–2045.
- 76 Q. Meng and J. Hu, *Sol. Energy Mater. Sol. Cells*, 2008, **92**, 1260–1268.
- 77 C. Alkan, E. Günther, S. Hiebler, Ö. F. Ensari and D. Kahraman, *Sol. Energy*, 2012, **86**, 1761–1769.
- 78 P. Xi, Y. Duan, P. Fei, L. Xia, R. Liu and B. Cheng, *Eur. Polym. J.*, 2012, **48**, 1295–1303.

- 79 P. Xi, F. Zhao, P. Fu, X. Wang and B. Cheng, *Mater. Lett.*, 2014, **121**, 15–18.
- 80 K. Peng, C. Chen, W. Pan, W. Liu, Z. Wang and L. Zhu, *Sol. Energy Mater. Sol. Cells*, 2016, **145**, 238–247.
- 81 X. Fu, W. Kong, Y. Zhang, L. Jiang, J. Wang and J. Lei, *RSC Adv.*, 2015, **5**, 68881–68889.
- 82 C. Chen, W. Liu, H. Wang and K. Peng, *Appl. Energy*, 2015, **152**, 198–206.
- 83 Z. Liu, X. Fu, L. Jiang, B. Wu, J. Wang and J. Lei, *Sol. Energy Mater. Sol. Cells*, 2016, **147**, 177–184.
- 84 X. Du, H. Wang, X. Cheng and Z. Du, *RSC Adv.*, 2016, **6**, 42643–42648.
- 85 X. Fu, Y. Xiao, K. Hu, J. Wang, J. Lei and C. Zhou, *Chem. Eng. J.*, 2016, **291**, 138–148.
- 86 K. Chen, R. Liu, C. Zou, Q. Shao, Y. Lan, X. Cai and L. Zhai, *Sol. Energy Mater. Sol. Cells*, 2014, **130**, 466–473.
- 87 Q. Cao and P. Liu, *Eur. Polym. J.*, 2006, **42**, 2931–2939.
- 88 Q. Cao and P. Liu, *J. Mater. Sci.*, 2007, **42**, 5661–5665.
- 89 Q. Cao, L. Liao and H. Xu, *J. Appl. Polym. Sci.*, 2010, **115**, 2228–2235.
- 90 L. Liao, Q. Cao and H. Liao, *J. Mater. Sci.*, 2010, **45**, 2436–2441.
- 91 Y. Jiang, E. Ding and G. Li, *Polymer*, 2002, **43**, 117–122.
- 92 Y. Li, R. Liu and Y. Huang, *J. Appl. Polym. Sci.*, 2008, **110**, 1797–1803.
- 93 P. Xi, X. Gu, B. Cheng and Y. Wang, *Energy Convers. Manag.*, 2009, **50**, 1522–1528.
- 94 B. Tang, Z. Yang and S. Zhang, *J. Appl. Polym. Sci.*, 2012, **125**, 1377–1381.
- 95 J. Guo, H. Xiang, Q. Wang, C. Hu, M. Zhu and L. Li, *Energy Build.*, 2012, **48**, 206–210.
- 96 H. Zhang, D. Sun, Q. Wang, J. Guo and Y. Gong, *J. Appl. Polym. Sci.*, 2014, **131**, 39755.

- 97 J. Meng, X. Tang, Z. Zhang, X. Zhang and H. Shi, *Thermochim. Acta*, 2013, **574**, 116–120.
- 98 J. Hu, H. Yu, Y. Chen and M. Zhu, *J. Macromol. Sci. Part B*, 2006, **45**, 615–621.
- 99 X. Gu, P. Xi, B. Cheng and S. Niu, *Polym. Int.*, 2010, **59**, 772–777.
- 100 X.-M. Zhou, *J. Appl. Polym. Sci.*, 2010, **21**, 1591–1595.
- 101 C. Chen, W. Liu, H. Yang, Y. Zhao and S. Liu, *Sol. Energy*, 2011, **85**, 2679–2685.
- 102 A. Sarı, C. Alkan and A. Biçer, *Mater. Chem. Phys.*, 2012, **133**, 87–94.
- 103 J. Guo, P. Xie, X. Zhang, C. Yu, F. Guan and Y. Liu, *J. Appl. Polym. Sci.*, 2014, **131**, 40152.
- 104 L. Yanshan, W. Shujun, L. Hongyan, M. Fanbin, M. Huanqing and Z. Wangang, *Sol. Energy Mater. Sol. Cells*, 2014, **127**, 92–97.
- 105 S.-Y. Mu, J. Guo, Y.-M. Gong, S. Zhang and Y. Yu, *Chinese Chem. Lett.*, 2015, **26**, 1364–1366.
- 106 H. Xiang, S. Wang, R. Wang, Z. Zhou, C. Peng and M. Zhu, *Sci. China Chem.*, 2013, **56**, 716–723.
- 107 S. Sundararajan, A. B. Samui and P. S. Kulkarni, *Sol. Energy Mater. Sol. Cells*, 2016, **149**, 266–274.
- 108 M. Karthikeyan, T. Ramachandran and O. L. S. Sundaram, *J. Ind. Text.*, 2013, **44**, 130-146.
- 109 N. Sarier and E. Onder, *Thermochim. Acta*, 2007, **452**, 149–160.
- 110 L. Sánchez, P. Sánchez, A. de Lucas, M. Carmona and J. F. Rodríguez, *Colloid Polym. Sci.*, 2007, **285**, 1377–1385.
